# Supplementary material
Source: PubMed Central journal article supplement (PMC3616749)
Supplement: NIHMS418102-supplement-01.pdf [file NIHMS418102-supplement-01.pdf]

Sequences obtained by linear amplification-mediated polymerase chain reaction are first localized to the rhesus genome to identify the integration site because of the higher homology to the baboon genome. The corresponding location on the human genome is then identified using the UCSC website as follows.

### 1) Integrant in monkey J01174, day 364 after transplant

#### LTR-chromosome junction

CCTACAGGTGGGGTCTTTCA**G**AGTCATCTGGCGCTCGGAACGCTAGTACAAGGCCCACTACTCAGTTGGCTCTTAAT  
 AAAATCTGTGAAACGAATTATAAAGTTGTTTTCTACTAGACCCTGTTGGGACACCAAGAAGCCTTCGTTCGGTAGCTT  
 AACTTGGCTGCGGTGCCGACCTGGAGGAAGGCGAAAGGGTTGTTAGCGTGACCAGACTCTGGTGACCTACACTGAG  
 AAGCTGAAGGGTCTCTTAAGCTTTGCGGTGC

#### Sequence localized to rhesus genome chromosome 14

|                    |            |             |             |            |          |
|--------------------|------------|-------------|-------------|------------|----------|
| gctagccagc         | gttcatgtct | acattattga  | tctcgtcttc  | ccctgtgtga | 14971629 |
| gtcactcacc         | tgtgagctcc | tagaggtcag  | ggaatgaatg  | tggttccgtg | 14971679 |
| <b>G</b> gGTCATCTG | GCcCTCGGAA | CGCTAGTACA  | AGGCCCACTA  | CTCAGTTGGC | 14971729 |
| TCTTAATAAA         | ATCTGTGAAA | CGAATTATAA  | AGTTGTTTTT  | TACTAGACCT | 14971779 |
| TGTTGGGACA         | CCAAGAAGCC | TTCGTTCGGTA | GCTTAACTTG  | GCTGCGGTGC | 14971829 |
| CCaACCTGGA         | GGAAGGCGAA | AGGGTTGTTA  | GCGTGACCAG  | ACTCTGGTGA | 14971879 |
| CCTACACTGA         | GAAGCTGAAG | GGTCTCTTAA  | GCTcTGC GGc | CGgaagccat | 14971929 |
| gtgcttctgc         | ggtttataca | atagcagctt  | tatcagaagt  | tacttttctg | 14971979 |
| cacactagcg         | tgtgacgta  | atttgtcttc  | ctgattcatc  | aa         |          |

#### Alignment of rhesus chromosome 14 to homologous human chromosome 11

|                   |             |             |            |              |          |
|-------------------|-------------|-------------|------------|--------------|----------|
| tcttactttt        | tatctgggcg  | ttggcgtaacc | tttctcgggg | tgtctgcgta   | 58102160 |
| actgccca          | cttgcccttg  | tttggtcaga  | tgacacctcc | tctgggactg   | 58102110 |
| GCTAGCCAGC        | GTTTCATGTCT | ACATTATTGA  | TCTCGTCTTC | CggTGTGTGA   | 58102060 |
| GTCACCTACC        | TGTGAGCTCC  | TAGAGGTCAG  | cGAcTaAATc | TGGTTCCaTG   | 58102010 |
| <b>G</b> GTCcTtgG | GCCCTCGGAg  | CcTAGcACA   | AGGCCCACTA | CTCAGTTGGC   | 58101960 |
| TCTTAATcAA        | ATCTGTGAAA  | CGAATTATAA  | AGTTGcTTTT | CTACTAGACC   | 58101910 |
| TTGTTGGGAC        | ACCAAGgAGC  | CggCGTCCGT  | tGCTTAACTT | GGaTGC GG TG | 58101860 |
| CCTgACCTaG        | AGGgAGGCGA  | AAGGGTTGTg  | AGCGTGACat | gaCTGGTGAC   | 58101810 |
| CTACACcGAG        | AAGCTGAAGG  | GTCTCTTAAG  | CTCTGCGGCC | GGAAGCCATc   | 58101760 |
| TGCTTCTGCG        | GTTTATACAA  | TAGCAaCTTT  | ATCAGAgGTT | ACTTTTCTGC   | 58101710 |
| ACgCTAGCGT        | aTGACaTTAA  | TTTGTCTTCC  | TGATTCATCA | Aaggggaattt  | 58101660 |
| ccgttgca          | gtgtgatgca  | gtggcctct   | cccatttctt | ttttcttttc   | 58101610 |
| atccattaca        | atcaaggaac  | gatttgcaag  | aacatccttt | a            |          |

The position of the vector provirus in monkey J01174 is on human chromosome 11:58102008

Supplementary Figure E1. Localization of vector proviruses to rhesus and human genomes.

**2) Integrant in monkey J00116, day 372 after transplant:****LTR-chromosome junction**

CCTACAGGTGGGGTCTTTCA**A**GGGGACGACGAGATCAATAATGTAGACATGAACGCTGGCTAGCCAGTTCAGAGGA  
GGTGTCTATCTGACCAAACCAAGGTAAGTCGGGGCAATT

**Sequence localized to rhesus genome chromosome 14**

|                    |            |            |            |            |          |
|--------------------|------------|------------|------------|------------|----------|
| tgagtagtgg         | gccttgact  | agcgttccga | gggccagatg | acccacgga  | 14971674 |
| accacattca         | ttccctgacc | tctaggagct | cacaggtgag | tgactcacac | 14971624 |
| <b>A</b> GGGGAaGAC | GAGATCAATA | ATGTAGACAT | GAACGCTGGC | TAGCCAGTTC | 14971574 |
| CAGAGGAGGT         | GTCATCTGAC | CAAACCAAGG | TAAGTCGGGG | CAATTacgca | 14971524 |
| gacaccccga         | gaaaggtacg | ccaacgcccc | gataaaaagt | aacaaaaaat | 14971474 |
| aggaaaaacc         | ctcccatcag | accagcaatt | ggctcaacgt | ttgag      |          |

**Alignment of rhesus chromosome 14 to homologous human chromosome 11**

|                    |            |            |            |            |          |
|--------------------|------------|------------|------------|------------|----------|
| atccaagtta         | agcaaccgac | gocggctcct | tggtgtccca | acaaggtcta | 58101915 |
| gtagaaaagc         | aactttataa | ttcgtttcac | agatttgatt | aagagccaac | 58101965 |
| <b>T</b> GAGTAGTGG | GCCTTGTgCT | AGgGcTCCGA | GGGCCcaAgG | ACCCCAtGGA | 58102015 |
| ACCagATTta         | gTCgCTGACC | TCTAGGAGCT | CACAGGTGAG | TGACTCACAC | 58102065 |
| <b>A</b> ccGGAAGAC | GAGATCAATA | ATGTAGACAT | GAACGCTGGC | TAGCCAGTcC | 58102115 |
| CAGAGGAGGT         | GTCATCTGAC | CAAACCAAGG | cAAGTCtGGG | CAgTTACGCA | 58102165 |
| GACACCCCGA         | GAAAGGTACG | CCAACGCCCA | GATAAAAAGT | AAgAAAAAgT | 58102215 |
| AGGAAAAACC         | CTCCCATCAG | ACCAGCAATT | GGCTcgacgc | ttgagcccgg | 58102265 |
| atgtacggca         | cgcgtcgcga | cctaaccggg | aaacactgcc | tcccgaaaaa | 58102315 |
| aaggtaaact         | ctagactgcg | gaaagtaaac | tacct      |            |          |

**The position of the vector provirus in monkey J00116 is on human chromosome 11:58102066**

**3) Integrant in monkey M01277, day 398 after transplant****LTR-chromosome junction**

CCTACAGGTGGGGTCTTTCA**T**TTCCTGTCTTTGGCCTTTCTGTCCCAGCGCCGAGATCTTGCGCGGAGAAGGGG  
GTAGTATTTTGGAGCTGTCGCTTCTCCTTTAAGAAAAAAGCCCCGTCGGTTGCCG

**Sequence localized to rhesus genome chromosome 14:**

|                    |             |            |             |             |          |
|--------------------|-------------|------------|-------------|-------------|----------|
| ctgcctccct         | aaggagccac  | tgatgcccga | agggctcttt  | ctattcttct  | 14970965 |
| ttaggccgca         | gaggtagcct  | ggcgcttctt | cctcctccac  | cctacccac   | 14971015 |
| <b>T</b> TTCCTGTCT | TTGGCCTTTC  | TGTCCCAGC  | GCCGCCAGAT  | CTTGCGCGGA  | 14971065 |
| GAAGGGGGTA         | GTATTTTGGAG | CTGTGCTTTC | TCCTTTAAGA  | AAAAAAGCCC  | 14971115 |
| CGTCGGTTGC         | CGgatgaaag  | tctctgaaaa | aatggcgggcg | gcaaaaacgga | 14971165 |
| ggcgggggtg         | tgggtcaacg  | agggcccggc | tcctagcgca  | tgtgcaccgt  | 14971215 |
| taacttaacc         | aa          |            |             |             |          |

Supplementary Figure E1. (continued)

**Alignment of rhesus chromosome 14 to homologous human chromosome 11:**

```

aggggcagtg cgagggggcag gtctcgcgag ggagggcgggt gagaagaaat 58102822
cgcacctctt tccccgcctc acgcaaacc tagactggct gcgcgcgcac 58102772
CTGCCTCCCT gAGGAGCCAC TGATaCCaCA AGGGCTCTTT CTATTCTTCT 58102722
TTAGGCCGCA GAaGTAGCCT GGGCGTTCTT CCgCCTCCAC CCTACCCAC 58102672
TTTCCTGTCT TTGGCCTTTC TGTCCCAGC GCCGCCAGAT CTTGCGCGGA 58102622
GAAGGGGGTA GTATTTTGAG CTGTGCTTC TCCTTTAAGA AAAAAAGCCC 58102572
CGTCGGTTGC CGGATGAAA TCTCTGAAA AATGGCGGCG GCAAAACGGA 58102522
GGCGGGGTTG TGGGggCAAC GAGGGCCCGC CTctTgGCGC ATGcGCACCG 58102472
TTAACTTAAC CAAgggcatt ctgggagatg aagtcttatt tcgcctaggc 58102422
tttaggaaaa atagatggga aaccagaggt ggagaggatg ccgggagggt 58102372
ctaactgagt cac

```

**The position of the vector provirus in monkey M01277 is on human chromosome 11:58102671**

**4) Location of all three vector proviruses on human chromosome 11**

- monkey J01174 chr 11:58102008 (reverse)
- monkey J00116 chr 11:58102066 (forward)
- monkey M01277 chr 11:58102671 (reverse)

```

CAAGGACcCC ATGGAACCAG ATTTAGTCGC TGACCTCTAG GAGCTCACAG 58102050
GTGAGTGACT CACACaCCGG AAGACGAGAT CAATAATGTA GACATGAACG 58102100
CTGGCTAGCC AGTCCCAGAG GAGGTGTCAT CTGACCAAAC CAAGGCAAGT 58102150
CTGGGCAGTT ACGCAGACAC CCCGAGAAAG GTACGCCAAC GCCCAGATAA 58102200
AAAGTAAGAA AAAGTAGGAA AAACCTCCC ATCAGACCAG CAATTGGCTC 58102250
GACGCTTGAG CCCGGATGTA CGGCACGCGT CGCGACCTAA CCCGAAACA 58102300
CTGCCCTCCG AAAAAAAGGT AAACCTAGA CTGCGGAAAG TAAACTACCT 58102350
TTCCCGTCGT GACTCAGTTA GAACCTCCC GCATCCTCTC CACCTCTGGT 58102400
TTCCCATCTA TTTTCTCTAA AGCCTAGGCG AAATAAGACT TCATCTCCA 58102450
GAATGCCCTT GGTTAAGTTA ACGGTGCGCA TGCGCCAAGA GGCGGGCCCT 58102500
CGTTGCCCCC ACAACCCCGC CTCCGTTTTG CCGCCGCCAT TTTTTCAGAG 58102550
ACTTTCATCC GGCAACCGAC GGGGCTTTTT TTCTTAAAGG AGAAGCGACA 58102600
GCTCAAAATA CTACCCCTT CTCCGCGCAA GATCTGGCGG CGCTGGGGAC 58102650
AGAAAGGCCA AAGACAGGAA aGTGGGGTAG GGTGGAGGCG GAAGAACGCC 58102700

```

**Supplementary Figure E1. (continued)**
